# Supplementary material for: Effects of Silirum®-Based Vaccination Programs on Map Fecal Shedding and Serological Response in Seven French Dairy Herds
Source: MDPI journal article supplement (doi:10.3390/ani13091569), 2023-05-08
Supplement: s1 [file s1]

## Supplementary materials

# Effects of Silirum<sup>®</sup>-Based Vaccination Programs on Map Fecal Shedding and Serological Response in Seven French Dairy Herds

Fabien Corbiere <sup>1,\*</sup>, Dorra Guellouz <sup>1</sup>, Christian Tasca <sup>1</sup>, Laurent Foures <sup>2</sup>, Emma Dubaux <sup>2</sup> and Gilles Foucras <sup>1</sup>

<sup>1</sup> INRAE, ENVT, UMR 1225 IHAP, 31076 Toulouse, France

<sup>2</sup> GDS Meuse, 55108 Verdun, France

\* Correspondence: fabien.corbiere@envt.fr; Tel.: +33561193234

Table S1 : Summary statistics of age at sampling in vaccinated and non-vaccinated cows according to sampling point. For vaccinated cows, time since vaccination (in months) is also reported.

Table S2 : Number of faecal samples according to the estimated Map concentration in the faeces, in each herd, and given the vaccination status of cows

Table S3 : Number of cows according to the estimated Map concentration in the faeces , in each herd, and given their vaccination status. For a given cow, the highest estimated concentration found across its faecal samples was used.

Table S1 : summary statistics (median [first quartile, third quartile]) of age at sampling (in months) in vaccinated and non-vaccinated cows according to sampling point. For vaccinated cows, time since vaccination (in months) is also reported.

|                            | Sampling point    |                   |                   |                   |
|----------------------------|-------------------|-------------------|-------------------|-------------------|
|                            | 1                 | 2                 | 3                 | 4                 |
| <b>Vaccinated cows</b>     |                   |                   |                   |                   |
| Number of cows             | 358               | 246               | 34                | -                 |
| Age                        | 44.9 [42.5; 48.9] | 54.5 [50.0; 59.5] | 58.8 [53.7; 66.0] | -                 |
| Time since vaccination     | 40.3 [37.0; 43.6] | 48.0 [43.6; 55.4] | 51.1 [46.5; 58.6] | -                 |
| <b>Non-vaccinated cows</b> |                   |                   |                   |                   |
| Number of cows             | 265               | 205               | 52                | 3                 |
| Age                        | 52.7 [48.7; 57.0] | 58.4 [54.7; 62.6] | 70.5 [62.1; 76.2] | 76.6 [75.9; 78.0] |

Table S2 : Number of faecal samples according to the estimated Map concentration in the faeces (in equivalent number of Map per gram of faeces), in each herd, and given the vaccination status of cows

| Herd    | Vaccination status | Estimated Map concentration (equivalent number of Map.g <sup>-1</sup> ) |                      |                                     |                                     |                                     |                  | Overall |
|---------|--------------------|-------------------------------------------------------------------------|----------------------|-------------------------------------|-------------------------------------|-------------------------------------|------------------|---------|
|         |                    | Neg                                                                     | [5-10 <sup>2</sup> [ | [10 <sup>2</sup> -10 <sup>3</sup> [ | [10 <sup>3</sup> -10 <sup>4</sup> [ | [10 <sup>4</sup> -10 <sup>5</sup> [ | >10 <sup>5</sup> |         |
| A       | Vaccinated         | 108                                                                     | 6                    | 0                                   | 1                                   | 0                                   | 0                | 115     |
|         | Non vaccinated     | 117                                                                     | 9                    | 4                                   | 0                                   | 0                                   | 1                | 131     |
| B       | Vaccinated         | 52                                                                      | 2                    | 0                                   | 0                                   | 0                                   | 0                | 54      |
|         | Non vaccinated     | 111                                                                     | 9                    | 1                                   | 1                                   | 0                                   | 0                | 122     |
| C       | Vaccinated         | 64                                                                      | 14                   | 0                                   | 0                                   | 0                                   | 0                | 78      |
|         | Non vaccinated     | 35                                                                      | 1                    | 0                                   | 0                                   | 0                                   | 0                | 36      |
| D       | Vaccinated         | 78                                                                      | 5                    | 2                                   | 0                                   | 0                                   | 0                | 85      |
|         | Non vaccinated     | 76                                                                      | 20                   | 1                                   | 1                                   | 2                                   | 1                | 101     |
| E       | Vaccinated         | 39                                                                      | 3                    | 0                                   | 1                                   | 0                                   | 0                | 43      |
|         | Non vaccinated     | 36                                                                      | 4                    | 1                                   | 1                                   | 0                                   | 0                | 42      |
| F       | Vaccinated         | 102                                                                     | 77                   | 17                                  | 11                                  | 5                                   | 2                | 214     |
|         | Non vaccinated     | 28                                                                      | 22                   | 8                                   | 0                                   | 2                                   | 1                | 61      |
| G       | Vaccinated         | 21                                                                      | 23                   | 1                                   | 2                                   | 1                                   | 1                | 49      |
|         | Non vaccinated     | 17                                                                      | 9                    | 1                                   | 1                                   | 0                                   | 1                | 29      |
| Overall | Vaccinated         | 464                                                                     | 130                  | 20                                  | 15                                  | 6                                   | 3                | 638     |
|         | Non vaccinated     | 420                                                                     | 74                   | 16                                  | 4                                   | 4                                   | 4                | 522     |

Table S3 : Number of cows according to the estimated Map concentration in the faeces (in equivalent number of Map per gram of faeces), in each herd, and given their vaccination status. For a given cow, the highest estimated concentration found across its faecal samples was used.

| Herd    | Vaccination status | Estimated Map concentration (equivalent number of Map.g <sup>-1</sup> ) |                      |                                     |                                     |                                     |                  | Overall |
|---------|--------------------|-------------------------------------------------------------------------|----------------------|-------------------------------------|-------------------------------------|-------------------------------------|------------------|---------|
|         |                    | Neg                                                                     | [5-10 <sup>2</sup> [ | [10 <sup>2</sup> -10 <sup>3</sup> [ | [10 <sup>3</sup> -10 <sup>4</sup> [ | [10 <sup>4</sup> -10 <sup>5</sup> [ | >10 <sup>5</sup> |         |
| A       | Vaccinated         | 57                                                                      | 6                    | 0                                   | 1                                   | 0                                   | 0                | 64      |
|         | Non vaccinated     | 61                                                                      | 9                    | 3                                   | 0                                   | 0                                   | 1                | 74      |
| B       | Vaccinated         | 26                                                                      | 2                    | 0                                   | 0                                   | 0                                   | 0                | 28      |
|         | Non vaccinated     | 45                                                                      | 7                    | 1                                   | 1                                   | 0                                   | 0                | 54      |
| C       | Vaccinated         | 37                                                                      | 14                   | 0                                   | 0                                   | 0                                   | 0                | 51      |
|         | Non vaccinated     | 19                                                                      | 1                    | 0                                   | 0                                   | 0                                   | 0                | 20      |
| D       | Vaccinated         | 38                                                                      | 5                    | 2                                   | 0                                   | 0                                   | 0                | 45      |
|         | Non vaccinated     | 28                                                                      | 17                   | 1                                   | 1                                   | 2                                   | 1                | 50      |
| E       | Vaccinated         | 18                                                                      | 3                    | 0                                   | 1                                   | 0                                   | 0                | 22      |
|         | Non vaccinated     | 15                                                                      | 4                    | 1                                   | 1                                   | 0                                   | 0                | 21      |
| F       | Vaccinated         | 33                                                                      | 52                   | 15                                  | 9                                   | 5                                   | 2                | 116     |
|         | Non vaccinated     | 9                                                                       | 10                   | 8                                   | 0                                   | 2                                   | 1                | 146     |
| G       | Vaccinated         | 12                                                                      | 15                   | 1                                   | 2                                   | 1                                   | 1                | 32      |
|         | Non vaccinated     | 9                                                                       | 5                    | 0                                   | 1                                   | 0                                   | 1                | 16      |
| Overall | Vaccinated         | 221                                                                     | 97                   | 18                                  | 13                                  | 6                                   | 3                | 358     |
|         | Non vaccinated     | 186                                                                     | 53                   | 14                                  | 4                                   | 4                                   | 4                | 265     |
