# Supplementary material for: Effects of Silirum®-Based Vaccination Programs on Map Fecal Shedding and Serological Response in Seven French Dairy Herds
Source: Animals (Basel). 2023 May 8;13(9):1569. doi: 10.3390/ani13091569 (PMC10177616; doi:10.3390/ani13091569)
Supplement: Supplementary file 1 [file animals-13-01569-s001.zip › CORBIERE_et_al_Animals_2023_data.xlsx]

## Sheet: Sheet 1
HERD	IDCOW	VACCINATED STATUS	AGE AT VACCINATIION (MONTHS)	DAYS IN MILK (MONTHS)	AGE AT SAMPLING (MONTHS)	ELISA S/P VALUE	qPCR CT VALUE	ESTIMATED MAP/g faeces	SAMPLE ORDER
A	A_1	0		18.4	78.3	6.27	36.01	26	1
A	A_2	0		11.9	64.5	8.53		0	1
A	A_3	0		9.7	58.2	-14.45		0	1
A	A_3	0		4.7	53.1	0.17		0	2
A	A_4	0		8	50.6	-5.7		0	1
A	A_4	0		8.2	61.9	8.21		0	2
A	A_5	0		13	55.6	-19		0	1
A	A_5	0		8	50.6	-23.34		0	2
A	A_6	0		10.1	54.7	-17.39		0	1
A	A_6	0		5.1	49.6	-23.8		0	2
A	A_7	0		11	65.2	-16.83		0	1
A	A_7	0		6	60.2	-0.97		0	2
A	A_8	0		8.4	59.3	-14.03		0	1
A	A_8	0		6.8	70.5	4.93		0	2
A	A_9	0		12.7	63.9	-14.03		0	1
A	A_9	0		7.7	58.9	-22.52		0	2
A	A_10	0		8.3	64.2	-19.37		0	1
A	A_11	0		3	74.3	-19.53		0	1
A	A_11	0		9.3	80.6	4.79		0	2
A	A_11	0		13.4	69.3	-25.71	33.77	88	3
A	A_12	0		5.2	69.9	31.05		0	1
A	A_12	0		6.8	58.7	-11.1		0	2
A	A_13	0		9	58	70.23		0	1
A	A_14	0		4.6	57.9	-13.18		0	1
A	A_15	0		4.7	57.2	-2.05		0	1
A	A_15	0		9.7	62.2	-18.58		0	2
A	A_16	0		3.1	56.3	-22.26	33.33	112	1
A	A_17	0		7.9	61	-11.04		0	1
A	A_17	0		2.9	56	-24.84		0	2
A	A_18	0		1.9	60.1	-10.72		0	1
A	A_18	0		8.3	55.1	2.3	37.88	10	2
A	A_19	0		3.2	55.2	-8.73	33.88	83	1
A	A_19	0		1	66.5	1.8		0	2
A	A_19	0		8.2	60.2	-3		0	3
A	A_20	0		0.6	59.7	-12.7		0	1
A	A_20	0		6.8	65.9	221.03		0	2
A	A_20	0		9.1	54.7	-7.08	35.76	30	3
A	A_21	0		6.8	54.4	-22.62		0	1
A	A_22	0		7.2	59.4	-14.07		0	1
A	A_22	0		2.2	54.4	-21.27	35.58	33	2
A	A_22	0		0.5	65.6	-0.4		0	3
A	A_23	0		3.7	54.3	-3.83		0	1
A	A_24	0		7.3	58.9	-18.9		0	1
A	A_24	0		2.3	53.8	-0.94		0	2
A	A_25	0		4.3	53.8	-19.09		0	1
A	A_25	0		15.6	65.1	0.61		0	2
A	A_26	0		2.1	58.4	-18.07		0	1
A	A_26	0		0.1	72.1	1.69		0	2
A	A_26	0		8.3	64.7	108.7		0	3
A	A_27	0		13.4	58.4	-3.18		0	1
A	A_27	0		8.4	53.4	-13.43		0	2
A	A_28	0		4.3	53.2	-20.14		0	1
A	A_29	0		4.8	52.8	-3.89		0	1
A	A_29	0		9.8	57.8	-16.35		0	2
A	A_30	0		3.9	63.6	35.11		0	1
A	A_30	0		7.8	52.4	-3.83		0	2
A	A_31	0		11	63.8	-1.2		0	1
A	A_31	0		5.9	58.8	-16.74		0	2
A	A_32	0		5	57	-21.73		0	1
A	A_32	0		10.1	62.1	-19.41		0	2
A	A_33	0		6.1	55.1	-18.57		0	1
A	A_33	0		11.2	60.2	-11.99		0	2
A	A_34	0		8.1	55	3.71		0	1
A	A_34	0		5.7	66.3	27.48		0	2
A	A_35	0		6.5	54.7	-13.63		0	1
A	A_36	0		5.7	50.6	-21.34	33.41	107	1
A	A_37	0		1.8	56.6	-18.72		0	1
A	A_38	0		3.9	51.5	5.75		0	1
A	A_39	0		8	59.1	85		0	1
A	A_39	0		1.7	52.9	-13.09		0	2
A	A_40	0		1.9	52.9	-18.51		0	1
A	A_40	0		0.3	66.6	2.55		0	2
A	A_40	0		8.1	59.1	90.63		0	3
A	A_41	0		7	79.5	4.26		0	1
A	A_41	0		13	65.7	2.35		0	2
A	A_42	0		1.8	65.7	7.44		0	1
A	A_42	0		1.8	52	-15.19		0	2
A	A_43	0		9.2	51.9	1.06		0	1
A	A_43	0		4.2	46.9	-23.46		0	2
A	A_44	0		7.4	51.9	-18.81		0	1
A	A_44	0		2.4	46.9	-25.32		0	2
A	A_45	0		5.2	58	154.87		0	1
A	A_45	0		6	46.8	-25.29		0	2
A	A_46	0		3	51.8	-5.79		0	1
A	A_46	0		9.2	58.1	85.93		0	2
A	A_47	0		6.6	65.4	4.16		0	1
A	A_47	0		3.8	46.7	-3.49		0	2
A	A_48	0		0.7	51.5	-18.53	32.74	154	1
A	A_48	0		6.9	57.7	57.67	31.25	343	2
A	A_49	0		7.9	65	7.88		0	1
A	A_50	0		1.7	51.1	-17.82		0	1
A	A_50	0		8	57.4	17.97		0	2
A	A_51	0		3.5	78.5	17.88		0	1
A	A_51	0		12.1	64.8	13.91		0	2
A	A_52	0		8.2	64.7	5.62		0	1
A	A_53	0		8.1	56.7	42.41		0	1
A	A_53	0		1.9	50.4	-17.59		0	2
A	A_54	0		13.4	63.8	4.25		0	1
A	A_54	0		7.7	77.6	4.77		0	2
A	A_55	0		10.4	77.1	3.4		0	1
A	A_55	0		12.8	63.4	6.44		0	2
A	A_56	0		6.1	63.4	3.82	36.5	20	1
A	A_57	0		0.3	63.1	3.5		0	1
A	A_58	0		9.3	55.7	0.78		0	1
A	A_58	0		3	49.4	-9.69		0	2
A	A_59	0		2.9	49.3	-8.8		0	1
A	A_59	0		9.1	55.5	4.51		0	2
A	A_60	0		0	55.4	40.53		0	1
A	A_60	0		5.7	49.1	-17		0	2
A	A_61	0		4	48.9	-19.17		0	1
A	A_62	0		1.8	62.5	4.8		0	1
A	A_63	0		10	62.1	8.68	33.65	94	1
A	A_64	0		9.7	54	2.31		0	1
A	A_64	0		3.5	47.7	-4.65		0	2
A	A_65	0		10.3	61	285.71	18.6	315116	1
A	A_66	0		6.3	74.4	4.78		0	1
A	A_66	0		5.2	60.6	3.21		0	2
A	A_67	0		1.5	46.5	-13.56		0	1
A	A_67	0		7.8	52.8	2.98		0	2
A	A_68	0		8.5	60.4	3.39		0	1
A	A_69	1	11.7	9.2	59.7	22.31	33.9	82	1
A	A_69	1	11.7	1.7	52.2	59.47		0	2
A	A_70	1	11.8	1.2	73.5	7.7		0	1
A	A_70	1	11.8	6.3	52.3	16.58		0	2
A	A_71	1	11.5	5.7	59.5	43.94		0	1
A	A_72	1	11.5	2.9	52	22.77		0	1
A	A_72	1	11.5	1.2	73.2	10.82	28.58	1448	2
A	A_73	1	11.2	2.3	51.7	57.67		0	1
A	A_73	1	11.2	9.8	59.2	33.73		0	2
A	A_74	1	11.2	8.5	59.2	16.52		0	1
A	A_74	1	11.2	1.1	51.7	0.58		0	2
A	A_75	1	11	3.7	59	154.12		0	1
A	A_75	1	11	17.4	72.7	119.61		0	2
A	A_76	1	10.5	13.8	58.4	24.09		0	1
A	A_76	1	10.5	6.3	51	5.3		0	2
A	A_77	1	10.4	5.6	50.9	7.27		0	1
A	A_78	1	10.1	0.4	58.1	5.18		0	1
A	A_78	1	10.1	4.3	50.6	14.91		0	2
A	A_79	1	10.1	9.7	58.1	15.91		0	1
A	A_79	1	10.1	2.2	50.6	58.13		0	2
A	A_80	1	9.6	5.9	50.1	9.98		0	1
A	A_80	1	9.6	0.2	57.6	3.13		0	2
A	A_81	1	9.5	12.9	57.5	21.76	35.39	37	1
A	A_81	1	9.5	5.4	50	5.48		0	2
A	A_82	1	9.5	3	57.4	7.03		0	1
A	A_83	1	9.4	6.9	49.9	6.5		0	1
A	A_83	1	9.4	0.7	43.7	-0.17		0	2
A	A_84	1	9.2	13.7	57.2	7.78		0	1
A	A_84	1	9.2	6.2	49.7	10.87		0	2
A	A_85	1	9.2	1.8	49.7	16.99		0	1
A	A_85	1	9.2	9.3	57.2	165.87		0	2
A	A_86	1	9.3	7.8	57.2	20.64	37.5	12	1
A	A_86	1	9.3	1.7	71	13.99		0	2
A	A_87	1	9.2	6	49.7	7.4		0	1
A	A_87	1	9.2	13.5	57.2	10.56		0	2
A	A_88	1	8.9	3.4	56.9	28.46		0	1
A	A_89	1	8.9	4	49.4	28.46		0	1
A	A_90	1	8.9	2.4	49.4	2.25		0	1
A	A_90	1	8.9	9.8	56.9	11.08		0	2
A	A_91	1	8.6	8.7	56.6	24.7	36.11	25	1
A	A_91	1	8.6	1.3	49.1	114.42		0	2
A	A_92	1	7.5	6	48	15.73		0	1
A	A_92	1	7.5	0.7	55.5	28.48		0	2
A	A_93	1	7	11.3	55	42.71		0	1
A	A_93	1	7	3.9	47.5	112.32		0	2
A	A_94	1	7.1	5.1	47.6	173.39		0	1
A	A_94	1	7.1	0.9	55.1	102.09	34.85	49	2
A	A_95	1	7	0.4	68.7	105.35		0	1
A	A_95	1	7	2.3	47.5	218.19		0	2
A	A_96	1	7.1	2.7	47.6	124.16		0	1
A	A_96	1	7.1	10.1	55.1	48.86		0	2
A	A_97	1	7	8.4	55	29.83		0	1
A	A_97	1	7	4.6	68.7	6.27		0	2
A	A_98	1	6.6	5.7	47.1	24.5		0	1
A	A_98	1	6.6	0.7	54.6	6.52		0	2
A	A_99	1	4.1	5.5	52.1	115.3		0	1
A	A_100	1	3.5	4.3	44	20.17		0	1
A	A_101	1	3.5	6.4	65.2	69.03		0	1
A	A_101	1	3.5	8.5	51.5	9.66		0	2
A	A_102	1	2.7	1.7	43.2	2.05		0	1
A	A_102	1	2.7	9.2	50.7	77.71		0	2
A	A_103	1	2.3	3.3	50.2	47.76		0	1
A	A_103	1	2.3	4.4	64	67.38		0	2
A	A_104	1	2.1	8.5	50.1	5.68		0	1
A	A_104	1	2.1	9.9	63.8	5.68		0	2
A	A_105	1	2	2.8	42.5	8.69		0	1
A	A_105	1	2	10.3	49.9	14.02	36.05	26	2
A	A_106	1	2.1	5.2	50.1	20.67		0	1
A	A_106	1	2.1	7.7	63.8	18.74		0	2
A	A_107	1	2	10.8	63.7	3.3		0	1
A	A_107	1	2	8.4	49.9	11.34		0	2
A	A_108	1	1.5	9.1	49.5	23.93		0	1
A	A_109	1	1.5	3.2	42	-1.08		0	1
A	A_110	1	4.7	9.2	49.1	12.18		0	1
A	A_110	1	4.7	11.1	62.9	7.28		0	2
A	A_111	1	4.7	6.3	62.9	12.85		0	1
A	A_111	1	4.7	5.6	49.1	28.73		0	2
A	A_112	1	4.7	6.5	62.8	8.09		0	1
A	A_112	1	4.7	5.2	49.1	9.85		0	2
A	A_113	1	4.7	6.1	62.8	28.16		0	1
A	A_113	1	4.7	5.2	49.1	49.35		0	2
A	A_114	1	4.7	10.6	62.8	22.56		0	1
A	A_114	1	4.7	8.2	49.1	18.55		0	2
A	A_115	1	4.5	10.9	62.6	27.03		0	1
A	A_115	1	4.5	8.2	48.9	47.97		0	2
A	A_116	1	4.4	3.4	48.8	7.29		0	1
A	A_116	1	4.4	17.1	62.6	28.81		0	2
A	A_117	1	2.7	15.4	60.8	11.4		0	1
A	A_117	1	2.7	1.7	47	16.13		0	2
A	A_118	1	2.5	1	46.9	0.47		0	1
A	A_119	1	1.7	2.3	46.1	17.58		0	1
A	A_119	1	1.7	3.4	59.9	43.82		0	2
A	A_120	1	5	3	45.2	61.23		0	1
A	A_120	1	5	16.7	59	23.48		0	2
A	A_121	1	4.9	0.9	45.1	52.18		0	1
A	A_122	1	4.8	0.7	45.1	98.39		0	1
A	A_122	1	4.8	0.2	58.8	21.92		0	2
A	A_123	1	3	0.6	43.2	9.12		0	1
A	A_123	1	3	14.3	56.9	6.52		0	2
A	A_124	1	2.4	0.5	42.6	6.78		0	1
A	A_125	1	6.3	0.7	41.9	20.43		0	1
A	A_126	1	6.2	6.9	67.9	31.09		0	1
A	A_126	1	6.2	8.5	54.1	29.51		0	2
A	A_127	1	6.1	3	46.6	-0.64		0	1
A	A_127	1	6.1	10.5	54.1	83.42		0	2
A	A_128	1	5.9	9.9	53.9	13.71		0	1
A	A_128	1	5.9	2.4	46.5	2.1		0	2
A	A_129	1	5.9	9.2	53.8	109.13		0	1
A	A_129	1	5.9	1.7	46.4	16.59		0	2
A	A_130	1	5.5	3.1	67.2	27.21		0	1
A	A_130	1	5.5	5.1	53.5	40.34		0	2
A	A_131	1	5.1	1.3	45.6	5.71		0	1
A	A_131	1	5.1	8.7	53	10.82		0	2
A	A_132	1	4.7	1.3	66.4	14.44		0	1
A	A_132	1	4.7	5.9	45.2	13.62		0	2
A	A_133	0		11.8	57	-6.63		0	1
A	A_133	0		6.8	51.9	-23.03		0	2
A	A_134	0		11.6	56.6	-17.27		0	1
A	A_134	0		2.8	62.9	-3.71		0	2
A	A_135	0		5.4	62.9	5.64		0	1
A	A_135	0		6.8	51.6	-9.83		0	2
A	A_136	0		5.8	50	-19.02	34.46	61	1
A	A_137	0		10.5	49.1	10.65		0	1
A	A_137	0		5.5	44	-21.48		0	2
A	A_138	0		5.3	42.9	-22.85		0	1
A	A_138	0		10.3	47.9	-10.95		0	2
B	B_1	0		5.7	72.7	-7.61		0	1
B	B_1	0		0.6	67.6	12.34		0	2
B	B_2	0		19.3	65.7	17.59		0	1
B	B_3	0		1.3	62.6	-10.95		0	1
B	B_3	0		10.9	57.6	44.22		0	2
B	B_4	0		4.1	61.9	-6.16		0	1
B	B_4	0		17.1	56.8	22		0	2
B	B_5	0		12.8	56.5	10.64	38.17	8	1
B	B_5	0		5	61.5	-2.38		0	2
B	B_6	0		15.1	56.1	33.07	36.98	16	1
B	B_6	0		10.3	67.4	25.14		0	2
B	B_6	0		4	61.1	21.19	38.97	5	3
B	B_7	0		10.2	55.5	26.15	36.18	24	1
B	B_7	0		1.5	60.5	-6.69		0	2
B	B_7	0		7.7	66.8	4.62	33.76	89	3
B	B_8	0		14.7	59.9	-10.43		0	1
B	B_9	0		10.8	54.7	15.64		0	1
B	B_10	0		7.4	54.7	11.33		0	1
B	B_10	0		7.1	87.2	3.91		0	2
B	B_10	0		12.4	59.7	-9.39		0	3
B	B_11	0		8.4	54.3	195.72	29.68	800	1
B	B_12	0		14.2	59	-10.31		0	1
B	B_12	0		9.2	54	4.24		0	2
B	B_13	0		12.9	58.9	-13.87		0	1
B	B_13	0		7.9	53.8	7.9	37.6	11	2
B	B_14	0		14.3	53	41.1		0	1
B	B_14	0		19.3	58.1	16.17		0	2
B	B_15	0		12.9	57.8	-20.28		0	1
B	B_15	0		7.9	52.8	52.37		0	2
B	B_16	0		1	57.8	-18.15		0	1
B	B_16	0		7.9	52.7	4.53		0	2
B	B_16	0		3.7	85.2	2.6		0	3
B	B_17	0		3.4	51.9	5.39		0	1
B	B_17	0		8.4	56.9	-17.66		0	2
B	B_18	0		4.9	51.4	5.07		0	1
B	B_18	0		9.9	56.4	0.1	26.93	3525	2
B	B_19	0		7.1	51.3	-0.02		0	1
B	B_19	0		12.5	83.7	1.94	34.59	57	2
B	B_19	0		12.2	56.3	-17.54		0	3
B	B_20	0		2.7	56	-8.17		0	1
B	B_20	0		16.4	69.7	19.03		0	2
B	B_20	0		9	62.2	9.83		0	3
B	B_21	0		4.8	50.9	7.32		0	1
B	B_21	0		9.8	56	-12.99		0	2
B	B_22	0		7.9	82.9	3.31		0	1
B	B_22	0		1.6	50.5	7.97		0	2
B	B_22	0		6.6	55.5	5.95		0	3
B	B_23	0		6.7	50.4	0.8		0	1
B	B_23	0		11.7	55.5	33.19		0	2
B	B_24	0		11.8	55.1	-15.63		0	1
B	B_24	0		6.7	50.1	4.83		0	2
B	B_25	0		0.5	53.8	-17.82		0	1
B	B_25	0		7.1	48.8	2.84		0	2
B	B_26	0		8.8	53.5	-17.62		0	1
B	B_26	0		3.7	48.5	3.62		0	2
B	B_27	0		9.7	51.5	-7.36		0	1
B	B_27	0		4.7	46.5	8.27		0	2
B	B_28	0		4.4	46	4.13		0	1
B	B_28	0		0.7	78.4	4.18		0	2
B	B_28	0		9.4	51	-14.77		0	3
B	B_29	0		6.5	45.3	0.74		0	1
B	B_29	0		11.5	50.3	-12.63		0	2
B	B_30	0		5.8	50.2	-15.65		0	1
B	B_31	0		4.8	50.1	-17.75		0	1
B	B_32	0		8.8	50	-10.92		0	1
B	B_32	0		3.8	44.9	5.47		0	2
B	B_32	0		8.4	77.4	3.51		0	3
B	B_33	0		6.8	44.5	48.6		0	1
B	B_33	0		11.8	49.5	7.63		0	2
B	B_34	0		3.1	44.5	2.94		0	1
B	B_34	0		8.1	49.5	-14.45		0	2
B	B_35	0		12.1	62.8	6.27		0	1
B	B_35	0		11.9	76.5	5.61		0	2
B	B_36	0		8.8	48.9	3.36		0	1
B	B_36	0		3.8	43.9	3.98		0	2
B	B_36	0		9	76.4	5.5		0	3
B	B_37	0		8	48.7	-18.93		0	1
B	B_37	0		2.9	43.6	7.37		0	2
B	B_37	0		4.8	76.1	3.68		0	3
B	B_38	0		0.2	54.4	-9.29		0	1
B	B_38	0		9.7	48.2	2.75		0	2
B	B_38	0		4.7	43.2	3.59	35.05	44	3
B	B_39	0		13.1	61.9	5.26		0	1
B	B_40	0		11.5	54.3	14.7		0	1
B	B_40	0		5.3	48.1	-5.74		0	2
B	B_40	0		8.4	75.5	5.94		0	3
B	B_41	0		9.6	54.3	1.62		0	1
B	B_41	0		3.3	48	-10.4		0	2
B	B_42	0		4.8	75.2	5.67		0	1
B	B_42	0		8.6	47.8	8.46		0	2
B	B_42	0		3.5	42.8	13.95		0	3
B	B_43	0		3.5	75.1	11.33		0	1
B	B_43	0		7.8	53.9	8.18		0	2
B	B_43	0		1.5	47.7	-14.41		0	3
B	B_44	0		11.4	74.6	7.28		0	1
B	B_44	0		3.3	42.2	4.28		0	2
B	B_44	0		8.3	47.2	-17.72		0	3
B	B_45	0		9.2	47.1	5.88		0	1
B	B_45	0		4.2	42.1	6.63		0	2
B	B_46	0		6.6	47	-16.35		0	1
B	B_46	0		1.5	42	4.13		0	2
B	B_47	0		16.4	60.6	4.24		0	1
B	B_47	0		8.9	53.2	5.8		0	2
B	B_47	0		2.7	46.9	-17.03		0	3
B	B_48	0		14.8	60.6	12.3		0	1
B	B_48	0		1.1	46.9	-17.53		0	2
B	B_49	0		11.7	60.6	7.55		0	1
B	B_49	0		7.3	74.3	3.69		0	2
B	B_50	0		1	73.8	11.92		0	1
B	B_50	0		11.3	60.1	9.69		0	2
B	B_51	0		5.1	73.7	6.16		0	1
B	B_51	0		11.2	52.5	1.51		0	2
B	B_51	0		5	46.2	-1.29		0	3
B	B_52	0		1	45.9	1.63		0	1
B	B_52	0		7.2	52.2	-2.29		0	2
B	B_52	0		1.6	73.4	4.58		0	3
B	B_53	0		2.2	45.9	14.77		0	1
B	B_53	0		15.9	59.6	7.29	35.09	43	2
B	B_53	0		8.5	52.2	26.68		0	3
B	B_54	0		0.6	45.7	-17.73		0	1
B	B_54	0		15.9	73.1	8.4		0	2
B	B_54	0		6.8	51.9	2.56		0	3
B	B_55	1	10.8	11.1	54.4	128.06		0	1
B	B_55	1	10.8	3.6	46.9	202.2		0	2
B	B_56	1	10.3	4	46.5	30.25		0	1
B	B_56	1	10.3	11.5	53.9	22.4		0	2
B	B_57	1	9.9	5.3	53.5	21.67		0	1
B	B_58	1	9.8	2.5	45.9	99.16		0	1
B	B_58	1	9.8	11.9	67.1	44.09		0	2
B	B_58	1	9.8	10	53.4	113.32		0	3
B	B_59	1	9.5	6.8	53.1	17.54		0	1
B	B_60	1	8.7	1.9	44.8	21.57		0	1
B	B_60	1	8.7	9.4	52.2	37.98		0	2
B	B_60	1	8.7	11.4	66	21.92		0	3
B	B_61	1	7.7	7.7	51.2	16.1		0	1
B	B_62	1	6.8	8.2	50.4	9.5		0	1
B	B_62	1	6.8	5.5	64.1	7.93		0	2
B	B_63	1	5.6	0.1	49.2	3.91		0	1
B	B_63	1	5.6	13.9	62.9	126.22		0	2
B	B_63	1	5.6	4.1	41.7	39.26		0	3
B	B_64	1	5.5	7.2	62.8	8.75	34.15	72	1
B	B_64	1	5.5	5	49.1	18.24		0	2
B	B_65	1	5.1	5	48.7	81.5		0	1
B	B_66	1	5	5.3	48.5	7.57		0	1
B	B_66	1	5	5.2	62.3	8.39		0	2
B	B_67	1	4.5	5.4	61.8	10.23		0	1
B	B_67	1	4.5	3.4	48.1	23.24		0	2
B	B_68	1	4.5	5.3	61.8	6.01		0	1
B	B_68	1	4.5	3.1	48	1.08		0	2
B	B_69	1	3.9	2.9	40	123.86		0	1
B	B_69	1	3.9	10.4	47.5	86.25		0	2
B	B_69	1	3.9	11.9	61.2	113.59		0	3
B	B_70	1	3.6	6.7	60.9	9.39		0	1
B	B_70	1	3.6	7.6	47.2	6.91		0	2
B	B_71	1	3.5	7.9	47.1	14.64		0	1
B	B_71	1	3.5	7.6	60.8	11.34		0	2
B	B_72	1	3.3	10.2	46.8	24.58		0	1
B	B_72	1	3.3	8.2	60.6	16.64		0	2
B	B_72	1	3.3	2.8	39.4	36.58		0	3
B	B_73	1	3.3	11.9	60.6	87.91		0	1
B	B_74	1	2.7	5.4	46.3	11.26		0	1
B	B_75	1	2.2	5.9	59.5	2.97		0	1
B	B_75	1	2.2	4.1	45.8	6.69		0	2
B	B_76	1	1.1	4.9	58.4	6.39		0	1
B	B_76	1	1.1	3.3	44.7	5.93		0	2
B	B_77	1	5	19.9	58.3	10.29		0	1
B	B_77	1	5	6.2	44.5	1.67	36.68	18	2
B	B_78	1	4.5	7.2	57.8	3.59		0	1
B	B_78	1	4.5	6.4	44.1	6.64		0	2
B	B_79	1	2.1	5.5	55.4	10.76		0	1
B	B_79	1	2.1	4	41.7	21.16		0	2
B	B_80	1	1.1	0.9	40.7	12.06		0	1
B	B_81	1	2.7	4.9	52.8	3.59		0	1
B	B_81	1	2.7	2.9	39	4.17		0	2
B	B_82	1	1.2	2.8	37.6	19.54		0	1
B	B_82	1	1.2	4.9	51.3	8.03		0	2
C	C_1	0		20.8	68.6	1.98		0	1
C	C_1	0		15.8	63.6	-0.25		0	2
C	C_2	0		3.6	68.6	-19.39		0	1
C	C_2	0		14	63.6	-0.88		0	2
C	C_3	0		13.5	59.2	9.42		0	1
C	C_3	0		3	64.2	14.05		0	2
C	C_4	0		23.4	58.6	1.82		0	1
C	C_5	0		10.6	58	7.06		0	1
C	C_6	0		4	55.7	0.38		0	1
C	C_6	0		2.9	67	1.84		0	2
C	C_7	0		11.8	55.3	10.15		0	1
C	C_8	0		8.8	55.1	-0.71		0	1
C	C_9	0		8.4	52.1	4.03		0	1
C	C_9	0		0.3	57.1	5.21		0	2
C	C_10	0		12.2	55.6	9.83		0	1
C	C_10	0		7.2	50.5	16.72		0	2
C	C_11	0		13.6	55.4	-0.66		0	1
C	C_11	0		8.5	50.4	-1.58		0	2
C	C_12	0		9.3	55.1	-14.23		0	1
C	C_12	0		4.3	50	4.43		0	2
C	C_13	0		4.2	54.3	-19.28		0	1
C	C_13	0		10.5	60.6	4.83		0	2
C	C_14	0		4.7	48.6	-4.12		0	1
C	C_14	0		9.8	53.6	-4.47		0	2
C	C_15	0		7.8	48.6	-2		0	1
C	C_15	0		5.5	59.8	4.01		0	2
C	C_16	0		10.8	59.8	18.63	39.34	4	1
C	C_16	0		4.6	53.6	24.45		0	2
C	C_17	0		8.9	48.1	10.03		0	1
C	C_17	0		14	53.1	-17.89		0	2
C	C_18	0		16.8	59.1	5.52		0	1
C	C_18	0		5.5	47.8	8.09		0	2
C	C_19	0		8	47.2	0.09		0	1
C	C_19	0		2.3	52.2	13.42		0	2
C	C_20	0		6.4	46.8	-1.98		0	1
C	C_20	0		1.2	51.8	-4.64		0	2
C	C_21	1	9.1	5.2	46.1	36.37		0	1
C	C_21	1	9.1	5.3	57.4	17.38	37.48	12	2
C	C_22	1	8.9	4.3	45.9	12.87		0	1
C	C_22	1	8.9	9.4	51	-3.96		0	2
C	C_23	1	8.9	10.3	45.9	28.53		0	1
C	C_24	1	8.7	4.5	50.8	18.91		0	1
C	C_25	1	8.4	6	50.5	74.38		0	1
C	C_25	1	8.4	0.9	56.7	28.7	38.41	7	2
C	C_26	1	8.1	7.5	45.1	44.2		0	1
C	C_26	1	8.1	0.1	50.1	7.8		0	2
C	C_27	1	8	8	50	41.33		0	1
C	C_27	1	8	2.9	45	51.14		0	2
C	C_28	1	7.9	8.5	50	246.53		0	1
C	C_28	1	7.9	3.5	44.9	197.98		0	2
C	C_29	1	7.9	11.3	50	-3.79		0	1
C	C_29	1	7.9	6.3	44.9	28.77		0	2
C	C_30	1	7.7	10.2	49.8	9.44		0	1
C	C_30	1	7.7	5.2	44.7	30.66		0	2
C	C_31	1	7.6	5	44.6	25.91		0	1
C	C_31	1	7.6	10	49.6	-2.67		0	2
C	C_32	1	7.4	7.1	44.5	77.58		0	1
C	C_32	1	7.4	18.4	55.7	85.67	36.06	26	2
C	C_32	1	7.4	12.1	49.5	19.01		0	3
C	C_33	1	7.3	3.6	49.4	28.68		0	1
C	C_34	1	7.3	9.7	49.3	50.68		0	1
C	C_34	1	7.3	4.7	44.3	62.67		0	2
C	C_35	1	6.8	2.1	55.1	110.15		0	1
C	C_35	1	6.8	5.3	43.8	99.04		0	2
C	C_35	1	6.8	10.3	48.9	108.95		0	3
C	C_36	1	6.7	7.6	43.8	198.11		0	1
C	C_37	1	6.5	7.9	48.5	-5.32		0	1
C	C_37	1	6.5	2.9	43.5	14.2		0	2
C	C_38	1	6	10.3	54.3	100.99		0	1
C	C_38	1	6	4.1	48	41.68		0	2
C	C_39	1	5.7	6	54	45.41		0	1
C	C_39	1	5.7	6.2	42.7	43.38		0	2
C	C_40	1	5.3	10.9	47.3	-14.77		0	1
C	C_40	1	5.3	5.9	42.3	5.54		0	2
C	C_41	1	4.8	10	46.9	-8.23		0	1
C	C_41	1	4.8	5	41.9	9.2		0	2
C	C_42	1	4.4	3.3	41.4	14.42		0	1
C	C_43	1	3.3	4.6	45.2	1.51		0	1
C	C_44	1	2.8	5.1	44.7	25.4		0	1
C	C_45	1	2.6	8.2	50.7	2.64	36.53	20	1
C	C_45	1	2.6	2	44.5	4.45		0	2
C	C_46	1	2.2	4.2	39	35.48		0	1
C	C_47	1	2.1	5.9	50.2	0.49	36.22	23	1
C	C_48	1	1.6	10.6	49.7	9	38.28	8	1
C	C_48	1	1.6	4.4	43.4	3.3		0	2
C	C_49	1	1.1	1.7	42.9	-16.49		0	1
C	C_49	1	1.1	8	49.1	5.11		0	2
C	C_50	1	1	2.9	49.1	3.84		0	1
C	C_50	1	1	12.4	42.9	2.93		0	2
C	C_51	1	0.9	7.4	42.8	-19.37		0	1
C	C_51	1	0.9	2.4	37.7	2.3		0	2
C	C_52	1	3.3	8.3	42.5	27.46		0	1
C	C_52	1	3.3	3.3	37.5	48.66		0	2
C	C_53	1	3.3	8.3	42.5	-20.13		0	1
C	C_53	1	3.3	3.3	37.5	-0.97		0	2
C	C_54	1	1.9	1.3	47.4	2.9	38.64	6	1
C	C_55	1	1.7	4.4	47.2	21.08		0	1
C	C_56	1	4.3	7.3	46.6	143.33		0	1
C	C_56	1	4.3	1	40.3	142.53		0	2
C	C_57	1	3.9	1.7	46.2	71.37		0	1
C	C_58	1	2.3	3.3	47.8	3.83	37.3	13	1
C	C_59	1	3.5	3.9	45.8	1.9	36.02	26	1
C	C_60	1	3	3.3	45.2	40.22		0	1
C	C_61	1	2.4	2.2	44.6	32.5		0	1
C	C_62	1	1.9	4.8	44.2	7.97		0	1
C	C_63	1	1.5	2.7	43.7	18.66	37.44	12	1
C	C_64	1	4.4	5.1	43.5	29.18		0	1
C	C_65	1	4.4	4.1	43.5	15.48	35.18	41	1
C	C_66	1	4.2	4.3	43.3	36.12	37.45	12	1
C	C_67	1	4.1	4.5	43.1	25.77		0	1
C	C_68	1	4	4.1	43.1	44.44	38.26	8	1
C	C_69	1	3.4	3.1	42.5	36.79		0	1
C	C_70	1	2.9	1.9	42	27.34	39	5	1
C	C_71	1	2.9	2	42	28.09		0	1
D	D_1	0		1.8	76.1	-0.5		0	1
D	D_1	0		14.9	71.1	2.94		0	2
D	D_2	0		20.4	70	6.72	38.15	8	1
D	D_2	0		5.7	81.2	9.36		0	2
D	D_3	0		11.6	66	5.38	36.53	20	1
D	D_4	0		9.8	63.1	-5.14		0	1
D	D_4	0		2.3	68.1	0.25	36.87	17	2
D	D_5	0		10.3	63	9.31	37.56	11	1
D	D_5	0		6	74.3	15.42		0	2
D	D_6	0		8	60.8	16.15		0	1
D	D_6	0		5.3	72.1	29.24		0	2
D	D_7	0		18.6	65.2	89.3	32.54	171	1
D	D_7	0		13.6	60.2	10.88	33.65	94	2
D	D_8	0		3.1	59.3	7.87		0	1
D	D_8	0		8.1	64.4	1.81		0	2
D	D_9	0		1.9	64	7.95		0	1
D	D_9	0		9.8	59	3.54		0	2
D	D_10	0		9.3	58.6	4.57		0	1
D	D_10	0		0.9	69.9	17.55		0	2
D	D_11	0		3	69.8	0.51		0	1
D	D_11	0		10.3	58.5	15.23		0	2
D	D_12	0		10.1	57.8	-2.13	35.1	43	1
D	D_12	0		5.1	69.1	3.38		0	2
D	D_13	0		12.2	62.6	-2.46	38.29	8	1
D	D_13	0		7.2	57.6	-4.49		0	2
D	D_14	0		1.7	56.8	-3.75		0	1
D	D_14	0		6.7	61.8	-3.68		0	2
D	D_15	0		10.3	67.8	8.98		0	1
D	D_15	0		4.1	61.5	1.24		0	2
D	D_16	0		8.9	56.3	71.82		0	1
D	D_17	0		8	56.3	-1.76		0	1
D	D_17	0		0.7	61.4	13.1		0	2
D	D_18	0		9.6	56.2	4.57		0	1
D	D_18	0		4.8	67.5	27.6		0	2
D	D_19	0		1.4	61.2	0.92		0	1
D	D_19	0		9.3	56.1	4.25		0	2
D	D_20	0		4.4	74.5	4.85		0	1
D	D_20	0		9.6	55.8	52.15	36.3	23	2
D	D_21	0		9.4	55.8	11.27	37.32	13	1
D	D_21	0		2.3	60.8	5.5		0	2
D	D_22	0		13.6	60.5	397.74	15.96	1308844	1
D	D_22	0		8.6	55.5	5.44		0	2
D	D_23	0		4.5	55.4	46.55	38.54	7	1
D	D_24	0		7.6	55.1	36.31		0	1
D	D_24	0		5.6	66.4	20.57		0	2
D	D_25	0		7.1	59.6	9.95		0	1
D	D_25	0		2.1	54.5	19.4	33.85	84	2
D	D_25	0		13.3	65.8	60.36		0	3
D	D_26	0		7.4	53.8	18.39		0	1
D	D_26	0		5.3	65.1	20.31		0	2
D	D_27	0		10.1	53.5	1.31		0	1
D	D_27	0		0.7	58.5	19.09		0	2
D	D_28	0		9.5	55.1	4.14		0	1
D	D_28	0		4.5	50.1	3.73		0	2
D	D_29	0		4.6	54	4.02		0	1
D	D_29	0		6.2	67.7	4.63		0	2
D	D_30	0		5.6	66.7	7.69	35.86	29	1
D	D_30	0		4.7	53	23.3	35.32	38	2
D	D_30	0		19.4	80.4	10.74		0	3
D	D_31	0		4.8	52.8	4.27		0	1
D	D_31	0		11	59.1	36.9	37.86	10	2
D	D_32	0		1.4	52.5	-0.55	39.44	4	1
D	D_32	0		7.7	58.8	4.76		0	2
D	D_33	0		13.5	79.8	9.2		0	1
D	D_33	0		13	66.1	7.2		0	2
D	D_34	0		8.6	66.1	6.22		0	1
D	D_35	0		3.4	52.2	5.72	35.14	42	1
D	D_35	0		9.6	58.4	22.59	36.2	24	2
D	D_36	0		11.9	65.9	4.3		0	1
D	D_37	0		1.2	79.5	7.43	24.96	10201	1
D	D_37	0		5.9	65.8	1.92		0	2
D	D_37	0		4	52.1	4.58		0	3
D	D_38	0		3.4	65.7	6.57		0	1
D	D_38	0		6.5	79.4	24.33	26.65	4100	2
D	D_39	0		4.3	52	-2.04		0	1
D	D_39	0		10.5	58.2	36.03		0	2
D	D_40	0		3	51.9	0.76		0	1
D	D_40	0		16.7	65.6	5		0	2
D	D_40	0		9.2	58.2	1.86		0	3
D	D_40	0		11.7	79.3	4.25		0	4
D	D_41	0		3.5	51.6	8.01	37.35	13	1
D	D_41	0		9.8	57.9	11.79		0	2
D	D_42	0		2.5	51.5	240.13	22.4	40581	1
D	D_43	0		13.3	64.8	8.05		0	1
D	D_44	0		6.2	50	4.69		0	1
D	D_44	0		1.2	45	26.3		0	2
D	D_45	0		4.2	49.5	-1.01		0	1
D	D_45	0		10.5	55.8	1.77		0	2
D	D_46	0		7.7	55.8	2.6		0	1
D	D_46	0		1.4	49.5	4.94	37.75	10	2
D	D_47	0		1.7	75.2	9.33		0	1
D	D_47	0		7.7	54	13.9		0	2
D	D_47	0		15.1	61.5	4.36		0	3
D	D_48	0		9.9	76.6	6.87		0	1
D	D_48	0		18.9	62.9	8.91		0	2
D	D_48	0		11.4	55.4	8.42		0	3
D	D_48	0		5.2	49.2	8.32		0	4
D	D_49	0		13.7	72.9	12.57		0	1
D	D_49	0		12.7	59.2	2.02	36.36	22	2
D	D_50	1	5.7	5.8	50.8	13.74		0	1
D	D_50	1	5.7	1.8	58.3	25.24		0	2
D	D_51	1	4.1	3.4	49.8	21.45		0	1
D	D_51	1	4.1	12.1	71	12.9		0	2
D	D_51	1	4.1	10.9	57.3	16.71		0	3
D	D_52	1	3.8	0.3	70.7	10.06		0	1
D	D_52	1	3.8	3.8	57	15.59		0	2
D	D_53	1	3.4	6.5	70.3	11.08		0	1
D	D_53	1	3.4	4.4	56.5	12.41		0	2
D	D_54	1	2.6	7.2	69.5	10.35		0	1
D	D_54	1	2.6	3.7	48.3	25.62		0	2
D	D_54	1	2.6	11.1	55.8	7.76		0	3
D	D_55	1	2.3	7.5	55.4	8.19		0	1
D	D_55	1	2.3	3.3	69.2	11.09		0	2
D	D_56	1	2.3	12.6	55.4	115.36		0	1
D	D_56	1	2.3	7.4	69.2	83.01		0	2
D	D_56	1	2.3	5.2	48	152.62		0	3
D	D_57	1	1.6	7	54.7	1.4		0	1
D	D_57	1	1.6	6.5	68.5	4.94		0	2
D	D_58	1	1.4	5.4	54.6	99.82	33.6	97	1
D	D_58	1	1.4	6.7	68.3	303.33		0	2
D	D_59	1	1.3	8.1	68.2	3.43		0	1
D	D_59	1	1.3	6.5	54.5	5.15		0	2
D	D_60	1	1.2	4.6	54.4	11.37	37.83	10	1
D	D_61	1	1.2	9.3	54.3	4.2		0	1
D	D_61	1	1.2	0.1	68.1	2.45		0	2
D	D_61	1	1.2	1.8	46.9	10.7		0	3
D	D_62	1	1.1	6.3	54.3	3.36		0	1
D	D_62	1	1.1	3.8	68	3.61		0	2
D	D_63	1	1.1	0.7	54.3	5.13		0	1
D	D_63	1	1.1	1.3	68	8.79		0	2
D	D_64	1	1.1	7.8	54.3	12.4		0	1
D	D_65	1	4.9	3.4	54.1	9.76	39.06	5	1
D	D_65	1	4.9	17.2	67.8	19.57		0	2
D	D_66	1	4.7	5.2	53.9	47.1		0	1
D	D_66	1	4.7	7.1	67.6	39.02		0	2
D	D_67	1	4.3	2.1	53.6	4.72		0	1
D	D_67	1	4.3	1.2	67.3	36.77		0	2
D	D_68	1	4	8.2	53.2	15.69		0	1
D	D_69	1	3.9	7.7	53.1	12.66		0	1
D	D_69	1	3.9	7.2	66.9	23.3		0	2
D	D_70	1	3.8	4	53	19.59		0	1
D	D_70	1	3.8	6	66.8	40.58		0	2
D	D_71	1	3.2	6.3	52.4	4.6		0	1
D	D_71	1	3.2	7.5	66.1	3.84		0	2
D	D_72	1	3	2.9	52.3	1.29		0	1
D	D_73	1	2.8	5.8	65.8	19.26		0	1
D	D_73	1	2.8	6.6	52	18.03		0	2
D	D_74	1	2.7	10.7	52	9.24		0	1
D	D_74	1	2.7	8.3	65.7	12.55		0	2
D	D_74	1	2.7	3.3	44.5	2.83		0	3
D	D_75	1	5.5	4.5	64.6	26.13		0	1
D	D_75	1	5.5	6.8	50.9	21.13		0	2
D	D_76	1	5.4	8.2	50.8	25.83		0	1
D	D_77	1	5.4	7.1	50.8	4.33		0	1
D	D_78	1	4.4	6.7	63.5	13.86		0	1
D	D_78	1	4.4	8	49.8	3.99		0	2
D	D_79	1	4.3	6.5	49.7	14.69		0	1
D	D_80	1	4.3	8.5	63.3	11.1	31.41	315	1
D	D_80	1	4.3	6.8	49.6	4.13		0	2
D	D_81	1	3.3	0.6	62.4	100.63	33.27	115	1
D	D_81	1	3.3	8	48.7	99.96		0	2
D	D_82	1	2.2	3.1	61.3	11.74		0	1
D	D_82	1	2.2	6.8	47.5	11.2		0	2
D	D_83	1	2	3.5	47.3	9.28		0	1
D	D_83	1	2	17.2	61.1	6.69	35.61	33	2
D	D_84	1	4.6	3.4	46	27.24		0	1
D	D_85	1	4.4	3.1	59.6	26.25		0	1
D	D_85	1	4.4	1.6	45.8	25.66		0	2
D	D_86	1	2.9	2.1	44.4	200.16		0	1
D	D_87	1	2.7	2.1	57.9	9.88	34.82	50	1
D	D_87	1	2.7	3.5	44.1	10.65		0	2
D	D_88	1	2.1	1.8	43.5	1.48		0	1
D	D_89	1	1.6	0.7	43.1	98.66		0	1
D	D_89	1	1.6	3.2	56.8	48.59		0	2
D	D_90	1	1.6	15	43.1	13.48		0	1
D	D_90	1	1.6	4.9	56.8	10.45		0	2
D	D_91	1	4.3	16.1	55.7	16.29		0	1
D	D_91	1	4.3	2.4	42	17.93		0	2
D	D_92	1	3.8	4.4	55.2	10.92		0	1
D	D_92	1	3.8	2.9	41.5	9.83		0	2
D	D_93	0		0.5	47.2	1.96		0	1
D	D_93	0		2.5	61	5.77		0	2
D	D_94	1	3.1	0.5	40.7	19.87		0	1
D	D_94	1	3.1	1.1	54.4	61.11		0	2
D	D_95	1	3.4	14.2	51.9	2.9		0	1
D	D_95	1	3.4	0.5	38.2	3.81		0	2
E	E_1	0		10.6	49.6	-1.32		0	1
E	E_1	0		3.9	54.7	8.14		0	2
E	E_2	0		17.9	55.2	295.92	34.46	61	1
E	E_3	0		3.2	60.4	-7.14		0	1
E	E_3	0		1.6	87.8	51.95		0	2
E	E_3	0		10.7	55.4	10.98		0	3
E	E_4	0		10	55.1	-2.72		0	1
E	E_5	0		15.4	55.5	0.92		0	1
E	E_5	0		10.4	50.4	13.7	38.68	6	2
E	E_6	0		6.1	48.4	8.23		0	1
E	E_6	0		5.6	59.7	12.18	36.8	17	2
E	E_6	0		3.3	80.9	5.65		0	3
E	E_7	0		12.7	37.8	42.84		0	1
E	E_8	0		10.7	48.4	19.49		0	1
E	E_8	0		4.9	59.7	12.53	38.43	7	2
E	E_9	0		5.4	58.4	0.3		0	1
E	E_9	0		5.6	47.1	-1.41		0	2
E	E_10	0		5.8	46.4	4.75		0	1
E	E_11	0		5	45.5	1.89		0	1
E	E_12	0		10.6	56.5	6.08		0	1
E	E_12	0		4.4	50.2	1.62		0	2
E	E_13	0		6.9	44.3	376.62	29.54	863	1
E	E_14	0		8.8	44.3	-0.43		0	1
E	E_14	0		5	55.6	1.72		0	2
E	E_14	0		9.2	76.7	5.25		0	3
E	E_15	0		9.8	54.6	20.39		0	1
E	E_15	0		17.3	62.1	23.55		0	2
E	E_15	0		3.6	48.4	10.15		0	3
E	E_16	0		6.3	48.2	-8.43		0	1
E	E_16	0		12.5	54.4	5.4		0	2
E	E_16	0		20	61.9	2.18		0	3
E	E_17	0		4.4	47.8	-14.22		0	1
E	E_17	0		6.1	61.5	10.76		0	2
E	E_17	0		6	75.3	6.06		0	3
E	E_18	0		4.8	42.4	16.81		0	1
E	E_18	0		13.9	74.9	4.66		0	2
E	E_18	0		9.8	47.5	1.61		0	3
E	E_19	0		6.7	60.9	12.97		0	1
E	E_20	0		6.2	46.9	3.96		0	1
E	E_20	0		12.4	53.1	242.17		0	2
E	E_21	0		3.5	46.6	1.91		0	1
E	E_21	0		9.7	52.8	5.75	27.64	2404	2
E	E_22	1	10.1	7.9	55	75.01		0	1
E	E_23	1	9.2	0.5	40.4	37.92	25.73	6734	1
E	E_24	1	8.8	1.9	40	169.66		0	1
E	E_24	1	8.8	8.1	46.2	105.6		0	2
E	E_25	1	8.2	3.7	39.4	190.11		0	1
E	E_25	1	8.2	9.9	45.6	215.94		0	2
E	E_26	1	7.9	0	52.8	13.24		0	1
E	E_26	1	7.9	0.8	39.1	100.91		0	2
E	E_26	1	7.9	7	45.3	149.13		0	3
E	E_27	1	7.8	0.7	52.7	131.42		0	1
E	E_27	1	7.8	14.5	66.5	110		0	2
E	E_27	1	7.8	6	45.3	191.29		0	3
E	E_28	1	7.8	0.7	52.7	135.17		0	1
E	E_28	1	7.8	2.2	66.4	157.92		0	2
E	E_28	1	7.8	5.1	45.2	102.11		0	3
E	E_29	1	7.3	12.8	52.2	41.73		0	1
E	E_29	1	7.3	1.2	65.9	31		0	2
E	E_29	1	7.3	5.4	44.7	118.19		0	3
E	E_30	1	7.2	14.4	52.1	139.18		0	1
E	E_30	1	7.2	0.7	38.4	71.33		0	2
E	E_30	1	7.2	6.9	44.6	118.85	37.64	11	3
E	E_31	1	6.6	6.2	44	60.98		0	1
E	E_31	1	6.6	1.5	51.5	78.29		0	2
E	E_32	1	5.5	2	50.4	124.83		0	1
E	E_32	1	5.5	6.1	42.9	76.93	38.63	6	2
E	E_33	1	5.3	12.2	50.2	151.55		0	1
E	E_33	1	5.3	4.7	42.8	100.56		0	2
E	E_34	1	5.1	6.9	63.7	10.05		0	1
E	E_34	1	5.1	6.7	50	19.19		0	2
E	E_35	1	4.9	6.6	49.8	128.55		0	1
E	E_35	1	4.9	5.3	63.5	113.33		0	2
E	E_36	1	2.4	1.8	47.3	2.31		0	1
E	E_37	1	2.7	5	43.1	1.61		0	1
E	E_38	1	2.2	4	42.5	9.81		0	1
E	E_39	1	2	3.9	42.3	4.27		0	1
E	E_39	1	2	5	56.1	9.73		0	2
E	E_40	1	1.7	1.4	41.1	5.04		0	1
E	E_40	1	1.7	15.1	54.8	6.66		0	2
E	E_41	1	0.4	5.6	53.5	6.1		0	1
E	E_41	1	0.4	3.9	39.8	2.72		0	2
E	E_42	1	2.8	3	39.7	12.51	35.24	40	1
E	E_43	1	1.6	1.7	52.2	6.1		0	1
E	E_43	1	1.6	1.2	38.4	14.2		0	2
F	F_1	0		3.7	50.3	42.62	36.24	23	1
F	F_1	0		10	56.6	26.4		0	2
F	F_2	0		10.6	55.4	3.64	35.2	41	1
F	F_2	0		4.3	49.1	-18.29	36.39	21	2
F	F_3	0		4.3	48.2	-20.01	34.78	51	1
F	F_3	0		10.6	54.4	-0.02	39.58	4	2
F	F_4	0		11	54.3	0.23		0	1
F	F_4	0		4.8	48.1	-17.88		0	2
F	F_5	0		4.7	48.1	-19.5	35.08	43	1
F	F_5	0		10.9	54.3	1.39		0	2
F	F_5	0		18.4	61.8	3.72		0	3
F	F_6	0		10.5	53.7	0.45		0	1
F	F_6	0		4.3	47.4	-19.62		0	2
F	F_7	0		16.7	74.2	-18.38		0	1
F	F_7	0		11.7	69.2	-17.58	29.89	714	2
F	F_8	0		10.6	60.1	-22.13	36.26	23	1
F	F_8	0		5.6	55.1	-19.5	31	392	2
F	F_8	0		2.4	66.3	-5.98		0	3
F	F_9	0		13	54.5	-17.78	33.1	126	1
F	F_9	0		5.5	65.8	-0.32	34.68	54	2
F	F_10	0		11.6	54.2	40.78	24.91	10480	1
F	F_11	0		0.2	58	-18.57	35.86	29	1
F	F_11	0		12	53	62.25		0	2
F	F_12	0		8.2	52.7	-11.55		0	1
F	F_13	0		10.2	62.1	2.69		0	1
F	F_13	0		4	55.9	-15.17	36.78	17	2
F	F_13	0		10	50.9	-21.1	33.69	92	3
F	F_14	0		11.1	50.4	-17.28	22.23	44478	1
F	F_14	0		9.9	61.7	-0.33	37.26	13	2
F	F_14	0		3.6	55.4	-19.39		0	3
F	F_15	0		7.6	55	-15.94	36.04	26	1
F	F_15	0		2.6	50	56.02	32.17	209	2
F	F_15	0		13.8	61.3	0.23	34.02	77	3
F	F_16	0		12	55	-19.81	35.85	29	1
F	F_16	0		6.9	50	-6.74	33.38	109	2
F	F_17	0		2.8	54.8	-17.93		0	1
F	F_17	0		9	61.1	-0.24		0	2
F	F_17	0		11.1	49.8	-6.56	34.44	61	3
F	F_18	0		7.3	49.6	-23.82	31.16	360	1
F	F_18	0		4.3	60.8	2.2		0	2
F	F_19	0		9.6	49	-17.41	20.33	123943	1
F	F_20	0		8.4	60	5		0	1
F	F_20	0		10.7	48.7	-18.62	32.57	168	2
F	F_20	0		2.2	53.7	-19.41	36.59	19	3
F	F_21	0		11.4	48.7	-22.15	32.68	159	1
F	F_21	0		5.9	60	-4.18		0	2
F	F_22	0		9.2	58.9	-0.24		0	1
F	F_22	0		9.4	47.6	-8.14	33.97	79	2
F	F_22	0		3	52.6	-11.37	35.1	43	3
F	F_23	0		5.6	52.2	-5.83	36.14	25	1
F	F_23	0		11.9	58.4	6.96	36.45	21	2
F	F_24	1	10.3	2.7	45.5	22.88		0	1
F	F_24	1	10.3	7.7	50.5	-9.92		0	2
F	F_25	1	10.2	8.4	56.7	20.96		0	1
F	F_25	1	10.2	8.3	45.4	41.56	33.26	116	2
F	F_25	1	10.2	2.2	50.5	25.3	37.52	12	3
F	F_26	1	10.2	10.7	45.4	15.11	33.33	112	1
F	F_26	1	10.2	5.5	56.7	30.98	39.51	4	2
F	F_27	1	9.8	5	56.2	146.27		0	1
F	F_27	1	9.8	8.1	45	169.92	33.72	90	2
F	F_28	1	9.2	8.6	44.4	-6.44	23.57	21590	1
F	F_28	1	9.2	1.5	49.4	103.98	38.03	9	2
F	F_29	1	9.1	9.5	49.4	67.17	37.84	10	1
F	F_29	1	9.1	4.4	44.4	62.21	36.88	16	2
F	F_29	1	9.1	23.2	63.1	65.39		0	3
F	F_30	1	8.8	11	49.1	56.83		0	1
F	F_30	1	8.8	6	44.1	25.33	34.6	56	2
F	F_31	1	7.9	3.6	48.1	29	37.56	11	1
F	F_32	1	7.6	6.4	42.8	5.32	31.86	247	1
F	F_33	1	7.6	9.7	47.9	41.33	35.32	38	1
F	F_33	1	7.6	4.7	42.8	0.56	33.38	109	2
F	F_34	1	7.6	9.3	47.9	182.08		0	1
F	F_34	1	7.6	4.3	42.8	48.29	33.65	94	2
F	F_35	1	7.3	7.3	47.5	132.58		0	1
F	F_35	1	7.3	2.3	42.5	52.79	32.14	212	2
F	F_35	1	7.3	13.5	53.8	180.35	36.53	20	3
F	F_36	1	7.3	5.7	42.5	-14.47	35.69	31	1
F	F_36	1	7.3	5	53.8	-2.91		0	2
F	F_37	1	7.3	2.6	42.5	-6.56	34.15	72	1
F	F_37	1	7.3	7.6	47.5	142.2		0	2
F	F_37	1	7.3	13.9	53.7	132.11	36.12	25	3
F	F_38	1	7.2	12.2	47.5	-9.88		0	1
F	F_38	1	7.2	6.2	53.7	40.26	35.71	31	2
F	F_38	1	7.2	7.1	42.4	23.64	37.17	14	3
F	F_39	1	7.2	9.9	47.4	-9.04	36.31	22	1
F	F_39	1	7.2	4.9	42.4	-17.93		0	2
F	F_40	1	7.1	3.7	42.3	-8.82	32.06	222	1
F	F_40	1	7.1	8.7	47.3	-6.05	37.78	10	2
F	F_41	1	7.1	4.3	42.3	132.27	25.53	7501	1
F	F_41	1	7.1	9.3	47.3	243.13	27.96	2023	2
F	F_42	1	6.9	5.5	53.4	1.67		0	1
F	F_42	1	6.9	5.6	42.2	19.27	33.49	102	2
F	F_43	1	6.8	5	53.3	8.72	37.45	12	1
F	F_43	1	6.8	6.6	42.1	-8.11		0	2
F	F_44	1	6.8	2.2	53.3	10.58		0	1
F	F_44	1	6.8	4.3	42.1	-2.8	25.66	6993	2
F	F_44	1	6.8	9.3	47.1	-6.21		0	3
F	F_45	1	6.4	8.7	46.7	68.04	35.52	34	1
F	F_45	1	6.4	3.7	41.6	125.88	35.46	35	2
F	F_45	1	6.4	3.4	52.9	68.26		0	3
F	F_46	1	6.4	6.4	46.6	-10.95	29.78	758	1
F	F_46	1	6.4	1.4	41.6	-16.15	38.35	7	2
F	F_47	1	5.9	2	41.1	24.22	36.6	19	1
F	F_48	1	5.8	10.2	52.3	95.71	38.69	6	1
F	F_48	1	5.8	4	46	93.53	35.21	41	2
F	F_49	1	5.7	3.6	52.2	-0.44	37.8	10	1
F	F_49	1	5.7	8.7	46	-16.72	34.78	51	2
F	F_49	1	5.7	3.6	41	-7.55	35.66	32	3
F	F_50	1	5.7	9.7	52.1	15.29		0	1
F	F_50	1	5.7	3.5	45.9	14.91		0	2
F	F_51	1	5.3	5.2	45.5	-14.3		0	1
F	F_51	1	5.3	11.4	51.7	1.62	30.51	511	2
F	F_52	1	5.1	2.4	51.5	33.4	36.2	24	1
F	F_52	1	5.1	9.6	45.3	41.57	26.72	3948	2
F	F_52	1	5.1	4.6	40.3	1.47	26.6	4212	3
F	F_53	1	4.9	9.3	51.4	5.02	32.96	136	1
F	F_53	1	4.9	3.1	45.1	-12.68		0	2
F	F_54	1	4.9	3.4	45.1	-9.74		0	1
F	F_54	1	4.9	9.6	51.4	-1.12		0	2
F	F_55	1	4.8	10.8	51.3	11.94	36.03	26	1
F	F_55	1	4.8	4.6	45	97.07	32.66	160	2
F	F_56	1	4.6	11.8	58.6	12.48		0	1
F	F_56	1	4.6	4.3	51.1	5.59	35.86	29	2
F	F_57	1	4.6	2.7	39.9	56.12		0	1
F	F_57	1	4.6	10.4	72.3	76.34		0	2
F	F_57	1	4.6	8.9	58.6	12.51		0	3
F	F_58	1	4.5	5.5	44.7	3.48		0	1
F	F_58	1	4.5	6.2	58.4	30.17		0	2
F	F_59	1	3.8	7.6	50.3	2.27	35.5	35	1
F	F_59	1	3.8	1.3	44.1	28.2		0	2
F	F_60	1	3.4	8.4	49.9	45.99	36.23	23	1
F	F_60	1	3.4	2.2	43.6	-10.17		0	2
F	F_61	1	3.3	2.5	43.6	-10.41	36.74	18	1
F	F_62	1	2.5	0.6	56.4	229.98	23.51	22300	1
F	F_62	1	2.5	5.5	49	232.67	30.03	662	2
F	F_63	1	2.5	7.9	49	6	38.8	6	1
F	F_63	1	2.5	1.7	42.7	2.09		0	2
F	F_64	1	1.8	8.2	48.3	20.34	32.76	152	1
F	F_64	1	1.8	2	42.1	-3.73		0	2
F	F_65	1	1.8	8.1	48.3	1.24	35.7	31	1
F	F_65	1	1.8	1.9	42	-20.11		0	2
F	F_66	1	8.8	0.5	41.7	-12.87	37.13	14	1
F	F_66	1	8.8	6.7	47.9	31.25	33.89	83	2
F	F_67	1	8.4	3	47.5	280.34	28.01	1969	1
F	F_68	1	4.1	6.9	46.9	55.93	35.51	34	1
F	F_68	1	4.1	0.7	40.6	30.48		0	2
F	F_69	1	3.8	8.4	46.6	115.1	35.83	29	1
F	F_69	1	3.8	2.1	40.3	122.25		0	2
F	F_70	1	3.6	6	53.8	8.07		0	1
F	F_71	1	3.3	7.9	46.1	-0.22	35.18	41	1
F	F_71	1	3.3	1.6	39.8	-17.64		0	2
F	F_72	1	3.1	2.7	39.6	-7.45	25.18	9060	1
F	F_72	1	3.1	8.9	45.8	10.08	35.83	29	2
F	F_73	1	2.5	1.2	39	-19.11	38.27	8	1
F	F_73	1	2.5	7.4	45.2	0.95	35.58	33	2
F	F_74	1	2.4	5.9	45.2	6.77	34.52	59	1
F	F_75	0		8.4	63.7	5.85		0	1
F	F_76	0		9	63.2	4.93		0	1
F	F_77	0		8.5	61.1	4.95		0	1
F	F_78	0		4.7	45.9	-20.73		0	1
F	F_79	0		0.6	57.7	0.99	36.95	16	1
F	F_79	0		2.1	44	-2.46		0	2
F	F_79	0		14.3	71.4	27.42		0	3
F	F_80	0		8.3	51.2	8.62		0	1
F	F_81	1	2.4	4.3	45.1	126.81		0	1
F	F_82	1	1.6	9.3	51.8	3.11		0	1
F	F_83	1	4.8	0.7	37.7	13.39	34.76	52	1
F	F_83	1	4.8	6.9	43.9	110.03	31.49	301	2
F	F_84	1	4.8	11.4	65.1	17.29		0	1
F	F_84	1	4.8	4.1	43.9	1.32	36.92	16	2
F	F_84	1	4.8	11.6	51.4	6.34		0	3
F	F_85	1	4.8	2.9	37.6	92.19	36.31	22	1
F	F_85	1	4.8	9.1	43.8	97.96	36.52	20	2
F	F_86	1	4.7	1.5	64.9	8.21	16.65	902103	1
F	F_86	1	4.7	8.7	43.7	20.09	36.43	21	2
F	F_87	1	3.8	16.2	64.1	322.26	16.34	1066285	1
F	F_87	1	3.8	2.4	50.4	211.03	31.57	289	2
F	F_88	1	3.8	11.3	50.3	22.98		0	1
F	F_88	1	3.8	3.8	42.9	21.86	35.3	39	2
F	F_89	1	3.7	3	42.8	2.91	33.91	82	1
F	F_90	1	3.7	5.4	42.8	39.88	34.81	50	1
F	F_90	1	3.7	12.8	50.2	19.5		0	2
F	F_91	1	3.5	0.8	36.3	-6.11		0	1
F	F_91	1	3.5	7	42.5	17.42	38.58	7	2
F	F_92	1	3.4	11.2	63.7	28.65	26.76	3864	1
F	F_92	1	3.4	3	42.5	4.81		0	2
F	F_93	1	3.4	1.5	42.5	34.6		0	1
F	F_93	1	3.4	9	49.9	26.3	36.85	17	2
F	F_94	1	3.4	5.9	42.5	43.08	35.9	28	1
F	F_94	1	3.4	0.6	49.9	26.62		0	2
F	F_95	1	3.2	3.7	42.3	39.47	36.11	25	1
F	F_96	1	3.2	4.2	49.7	1.5		0	1
F	F_97	1	2.5	8.3	49	5.59	37.85	10	1
F	F_97	1	2.5	8	62.8	39.57	27	3395	2
F	F_98	1	1.7	9.7	48.2	4.2		0	1
F	F_99	1	1.6	2.4	40.6	18.58		0	1
F	F_99	1	1.6	7.8	61.8	10.44	21.68	59839	2
F	F_99	1	1.6	9.9	48.1	8.98		0	3
F	F_100	1	1.5	7.3	48	25.99		0	1
F	F_101	1	1.2	5.7	47.7	5.38		0	1
F	F_102	1	1.1	8.4	47.7	17.72		0	1
F	F_103	1	5.7	5.7	47.4	95.7	36.72	18	1
F	F_103	1	5.7	3.7	61.1	113.63	21.99	50625	2
F	F_104	1	4.4	6.6	59.8	24.81		0	1
F	F_104	1	4.4	4.2	46.1	4.6		0	2
F	F_105	1	4.4	6.6	46.1	9.17	36.83	17	1
F	F_106	1	4.3	2.7	46	13.19	37.75	10	1
F	F_107	1	3.9	7	45.6	21.35		0	1
F	F_108	1	3.9	7.2	45.6	8.03		0	1
F	F_108	1	3.9	7.8	59.3	9.24	31.31	332	2
F	F_109	1	3.7	1.4	59.2	24.51	31.66	275	1
F	F_109	1	3.7	3.4	45.4	26.48		0	2
F	F_110	1	3.7	1.5	45.4	6.11		0	1
F	F_110	1	3.7	0.5	59.2	8.74		0	2
F	F_111	1	3.7	7.7	45.4	5.04		0	1
F	F_112	1	3.2	7	44.9	2.9		0	1
F	F_112	1	3.2	7.2	58.6	8.79		0	2
F	F_113	1	3.2	1.7	37.5	69.15	36.72	18	1
F	F_114	1	3.2	1.8	44.8	23.57		0	1
F	F_114	1	3.2	3	58.6	17.99		0	2
F	F_115	1	3.1	6.9	44.7	9.75		0	1
F	F_116	1	2.8	3.2	58.3	6.11		0	1
F	F_116	1	2.8	4.7	44.5	2.27	39.01	5	2
F	F_117	1	1.9	1.9	43.6	3.07		0	1
F	F_118	1	1.9	8.5	57.3	17.59		0	1
F	F_118	1	1.9	6.5	43.6	7.19		0	2
F	F_119	0		5	47.3	0.67		0	1
F	F_119	0		6.2	61	7.37		0	2
F	F_120	1	1.6	4.5	43.3	10.4	36.19	24	1
F	F_121	1	1.4	6.2	43.1	4.41		0	1
F	F_121	1	1.4	6.4	56.9	7.11		0	2
F	F_122	1	1.4	3.7	43.1	1.55	37.9	9	1
F	F_122	1	1.4	3.1	56.8	8.32		0	2
F	F_123	1	4.9	3.1	42.8	184.02		0	1
F	F_123	1	4.9	5	56.5	208.22		0	2
F	F_124	1	4.9	5.8	42.8	118.58	33.85	84	1
F	F_124	1	4.9	6.6	56.5	105.51		0	2
F	F_125	1	4.7	3.5	42.5	43.24		0	1
F	F_125	1	4.7	1.9	56.2	39.17	26.34	4846	2
F	F_126	1	4.9	4.7	56.4	8.3	24.97	10146	1
F	F_126	1	4.9	5.1	42.7	7.03		0	2
F	F_127	1	4.6	1.1	42.5	192.3		0	1
F	F_127	1	4.6	2	56.2	41.2	34.4	63	2
F	F_128	1	4.3	4.5	42.1	67.82	33.95	80	1
F	F_128	1	4.3	5.9	55.9	71.22		0	2
F	F_129	1	3.9	3.9	41.8	43.28		0	1
F	F_130	1	3.9	0.9	41.8	10.4	34.5	59	1
F	F_130	1	3.9	14.6	55.5	23.59		0	2
F	F_131	1	3.6	0.5	41.5	11.36		0	1
F	F_131	1	3.6	0	55.2	5.24		0	2
F	F_132	1	3.5	1.4	41.4	12.79	36.37	22	1
F	F_133	1	2.9	0.4	54.5	49.12		0	1
F	F_133	1	2.9	2.9	40.7	92.98	34.63	55	2
F	F_134	1	2.8	3.2	40.7	6.66		0	1
F	F_135	1	2.2	14.9	53.8	7.83		0	1
F	F_135	1	2.2	1.1	40.1	5.81		0	2
F	F_136	1	1.6	0.9	39.4	5.1	37.04	15	1
F	F_137	1	1.3	3	39.1	4.89		0	1
F	F_138	1	4.5	2.7	38.8	8.32	34.67	54	1
F	F_138	1	4.5	1.9	52.5	22.33		0	2
F	F_139	1	4.4	0.8	38.7	4.05	35.92	28	1
F	F_139	1	4.4	14.6	52.4	11.41	28.1	1875	2
F	F_140	1	4	1.3	38.2	12.94	36.9	16	1
F	F_140	1	4	15	52	17.52		0	2
F	F_141	1	3.5	2.3	51.5	8.24		0	1
F	F_141	1	3.5	0.8	37.8	4.99	38.18	8	2
F	F_142	1	3.5	1.8	37.7	49.86		0	1
F	F_142	1	3.5	15.5	51.5	59.76		0	2
F	F_143	1	3.1	1.4	37.3	45.93	37.23	14	1
F	F_143	1	3.1	0.7	51.1	60.76		0	2
F	F_144	1	2.9	3.4	50.9	47.19		0	1
F	F_144	1	2.9	1.5	37.1	59.75		0	2
F	F_145	1	2.4	2.5	50.4	2.54		0	1
F	F_145	1	2.4	0.8	36.6	4.54		0	2
F	F_146	1	2.3	0.4	36.6	3.64		0	1
G	G_1	0		9.9	61.9	0.95		0	1
G	G_2	0		15.1	60.2	-2.17		0	1
G	G_3	0		2.2	60.4	-3.19		0	1
G	G_3	0		9	55.4	-4.18		0	2
G	G_4	0		8.5	55.4	59.69	36.28	23	1
G	G_4	0		8.4	66.7	10.09	37.54	12	2
G	G_4	0		2.2	60.4	7.02	37.44	12	3
G	G_5	0		1	53.3	-6.65		0	1
G	G_5	0		12.3	64.5	2.26	36.95	16	2
G	G_6	0		3.3	57.6	-0.57		0	1
G	G_6	0		10.1	52.6	-0.79		0	2
G	G_7	0		12.3	57.5	-5.76	27.71	2315	1
G	G_7	0		7.3	52.5	-1.81	37.71	11	2
G	G_8	0		9.9	51.7	18.46		0	1
G	G_9	0		10.2	55.8	1.19	19.21	226767	1
G	G_9	0		3.4	62	-0.31	30.94	405	2
G	G_10	0		1.3	55.7	-3.7		0	1
G	G_10	0		9.8	50.7	-1.81		0	2
G	G_11	0		5.4	61.7	156.13		0	1
G	G_11	0		6	50.4	-3.65		0	2
G	G_12	0		7.5	49.1	-3.94		0	1
G	G_13	0		6.4	54	-2.12		0	1
G	G_13	0		1.4	49	-2.64	36.05	26	2
G	G_14	0		5.7	59.1	7.19		0	1
G	G_14	0		6	47.8	-4.83		0	2
G	G_15	0		0.6	52.8	-3.04	37.54	12	1
G	G_15	0		7.1	47.8	-5.28	36.82	17	2
G	G_16	1	10.7	4.3	45.7	196.14	36.33	22	1
G	G_16	1	10.7	9.3	50.7	149.39		0	2
G	G_16	1	10.7	3.7	57	5.12	37.2	14	3
G	G_17	1	10.2	6.1	50.1	38.17		0	1
G	G_17	1	10.2	12.4	56.4	8.48		0	2
G	G_18	1	10.2	0.9	56.4	13.94		0	1
G	G_19	1	10	10.5	50	51.67		0	1
G	G_19	1	10	5.5	44.9	77.24	26.44	4592	2
G	G_20	1	9.9	2.5	44.9	151.66		0	1
G	G_20	1	9.9	0.6	56.1	16.31		0	2
G	G_20	1	9.9	7.5	49.9	103.51		0	3
G	G_21	0		10.3	46.3	11.87	34.67	54	1
G	G_21	0		2.5	52.5	7.3		0	2
G	G_22	1	9.2	8.9	49.1	42.99		0	1
G	G_22	1	9.2	3.8	44.1	65.26	38.53	7	2
G	G_23	1	8.4	12.3	48.4	55.03	34.59	57	1
G	G_23	1	8.4	7.3	43.4	112.08	38.95	5	2
G	G_23	1	8.4	3.1	54.6	9.98	35.93	27	3
G	G_24	1	8.1	3.8	43	78.64	24.34	14252	1
G	G_25	1	7.1	2	47.1	78.62	36.59	19	1
G	G_25	1	7.1	8.3	53.4	52.74	35.16	42	2
G	G_26	1	7.1	15	53.3	31.01	38.53	7	1
G	G_26	1	7.1	8.8	47	99.92	36.43	21	2
G	G_26	1	7.1	3.7	42	112.79		0	3
G	G_27	1	6.3	3.8	46.3	254.09	15.97	1301803	1
G	G_28	1	6.3	12.6	52.5	45.01	35.86	29	1
G	G_28	1	6.3	1.4	41.2	86.65	35.88	28	2
G	G_28	1	6.3	6.4	46.3	107.69	38.72	6	3
G	G_29	1	6.1	4.3	41.1	1.42		0	1
G	G_30	1	5.6	12.3	51.8	66.25		0	1
G	G_30	1	5.6	6	45.6	5		0	2
G	G_31	1	3.4	5.7	49.6	46.05	35.76	30	1
G	G_32	1	3.4	6.4	49.6	112.94		0	1
G	G_33	1	2.9	3.2	49.1	179.39	35.47	35	1
G	G_34	1	2.7	0.6	42.6	-3.72	31.4	316	1
G	G_34	1	2.7	6.8	48.9	56.91	38.01	9	2
G	G_35	1	0.9	4.8	47.1	125.22		0	1
G	G_36	1	3.6	2.5	45.8	26	34.8	51	1
G	G_37	1	3.6	6.8	45.8	76.99		0	1
G	G_37	1	3.6	0.6	39.6	7.65	25.67	6956	2
G	G_38	1	3.4	3.4	45.6	24		0	1
G	G_39	1	1.6	1.2	43.9	27.38	37.99	9	1
G	G_40	1	1	1	43.2	115.99	39.07	5	1
G	G_41	1	3.4	4.4	43.2	26.71	39.2	5	1
G	G_42	1	3.4	6	43.1	61.39		0	1
G	G_43	1	3.4	6.2	43.1	43.94	35.24	40	1
G	G_44	1	3.3	4.2	43	21.46		0	1
G	G_45	1	3.2	5.6	42.9	98.73	37.01	15	1
G	G_46	1	2.3	5.5	42.1	107.92		0	1
G	G_47	1	2.3	5.1	42	64.47		0	1
G	G_48	1	2.2	4	41.9	335.21	34.08	75	1
